# Supplementary material for: Glutathione Modulation in PVYNTN Susceptible and Resistant Potato Plant Interactions
Source: MDPI journal article supplement (doi:10.3390/ijms23073797), 2022-03-30
Supplement: s1 [file s1]

**Table S1.** PVY<sup>NTN</sup> detection using DAS-ELISA assay in mock- and virus-inoculated potato plants as reflected by mean OD405nm values. The absence of a virus is marked by (-). The presence of PVY<sup>NTN</sup> (+) is considered positive when the mean OD405nm values over the cut-off point (0.129).

| Sample                                                    | Mean OD <sub>450nm</sub> | Presence (+)/Absence of the Virus (-) |
|-----------------------------------------------------------|--------------------------|---------------------------------------|
| Buffer                                                    | 0.0000                   | -                                     |
| Mock-inoculated potato cv. Irys (3 dpi)                   | 0.0400                   | -                                     |
| Mock-inoculated potato cv. Neptun (3 dpi)                 | 0.0389                   | -                                     |
| PVY <sup>NTN</sup> -inoculated potato cv. Irys (3 dpi)    | 0.7493                   | +                                     |
| PVY <sup>NTN</sup> -inoculated potato cv. Neptun (3 dpi)  | 0.5932                   | +                                     |
| Mock-inoculated potato cv. Irys (7 dpi)                   | 0.0408                   | -                                     |
| Mock-inoculated potato cv. Neptun (7 dpi)                 | 0.0404                   | -                                     |
| PVY <sup>NTN</sup> -inoculated potato cv. Irys (7 dpi)    | 1.0698                   | +                                     |
| PVY <sup>NTN</sup> -inoculated potato cv. Neptun (7 dpi)  | 0.8964                   | +                                     |
| Mock-inoculated potato cv. Irys (21 dpi)                  | 0.0440                   | -                                     |
| Mock-inoculated potato cv. Neptun (21 dpi)                | 0.0611                   | -                                     |
| PVY <sup>NTN</sup> -inoculated potato cv. Irys (21 dpi)   | 3.003                    | +                                     |
| PVY <sup>NTN</sup> -inoculated potato cv. Neptun (21 dpi) | 0.3001                   | +                                     |

**Table S2. Heatmap of PCC for *StGSTF2* normalized expression (based on *StEflα*) and PVY levels** in virus-inoculated susceptible potato Irys (**A**) and hypersensitive potato Neptun (**B**) from 3 to 21 dpi. PCC matrix values are presented pairwise for specific cell compartments in specific time dpi and marked with colors, from very dark green (PCC = 1) to bright green (PCC = -1) in susceptible reaction and , from very dark brown (PCC = 1) to bright brown (PCC = -1) in hypersensitive reaction.

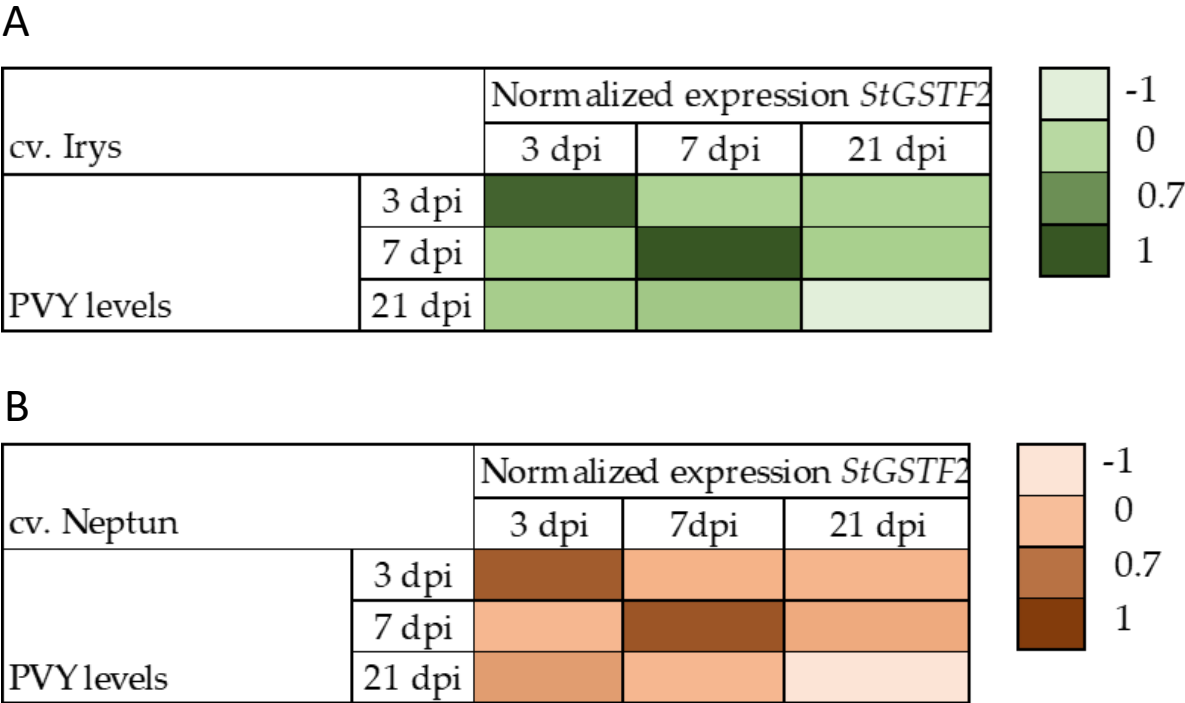

**Table S3. Heatmap of PCC for *StGSTF2* normalized expression (based on *StEflα*) and GSSG content** in PVY-inoculated susceptible potato Irys (**A**) and hypersensitive potato Neptun (**B**) from 3 to 21 dpi. PCC matrix values are presented pairwise for specific cell compartments in specific time dpi and marked with colors, from very dark green (PCC = 1) to bright green (PCC = -1) for susceptible reaction and, from very dark green (PCC = 1) to bright green (PCC = -1) for hypersensitive response.

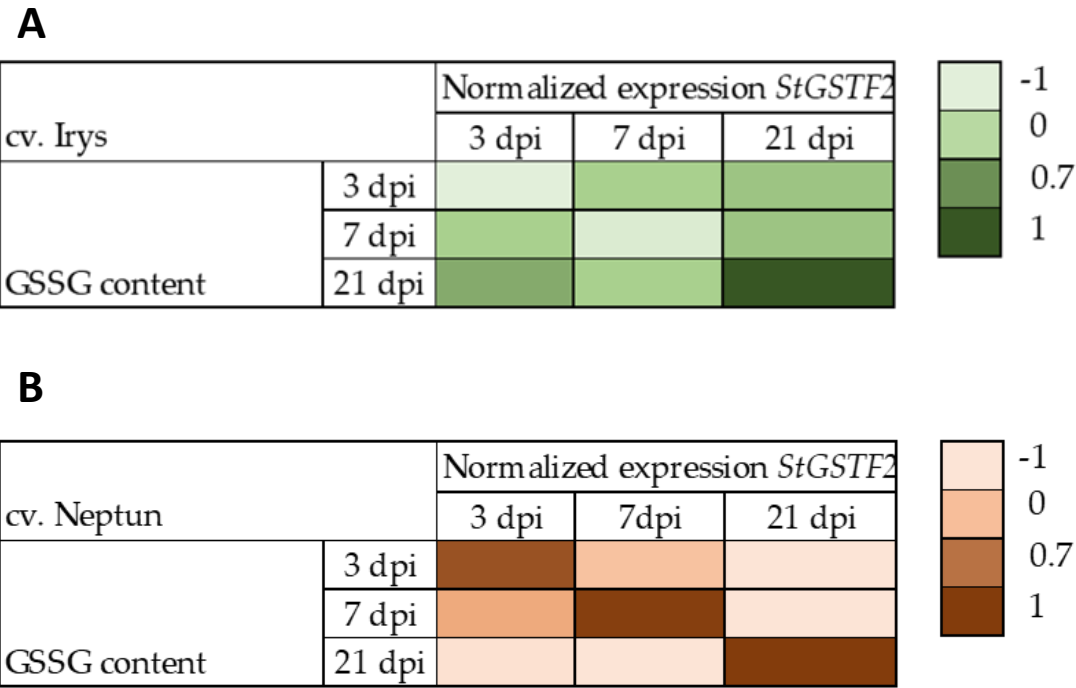

## Supplement Figure S1

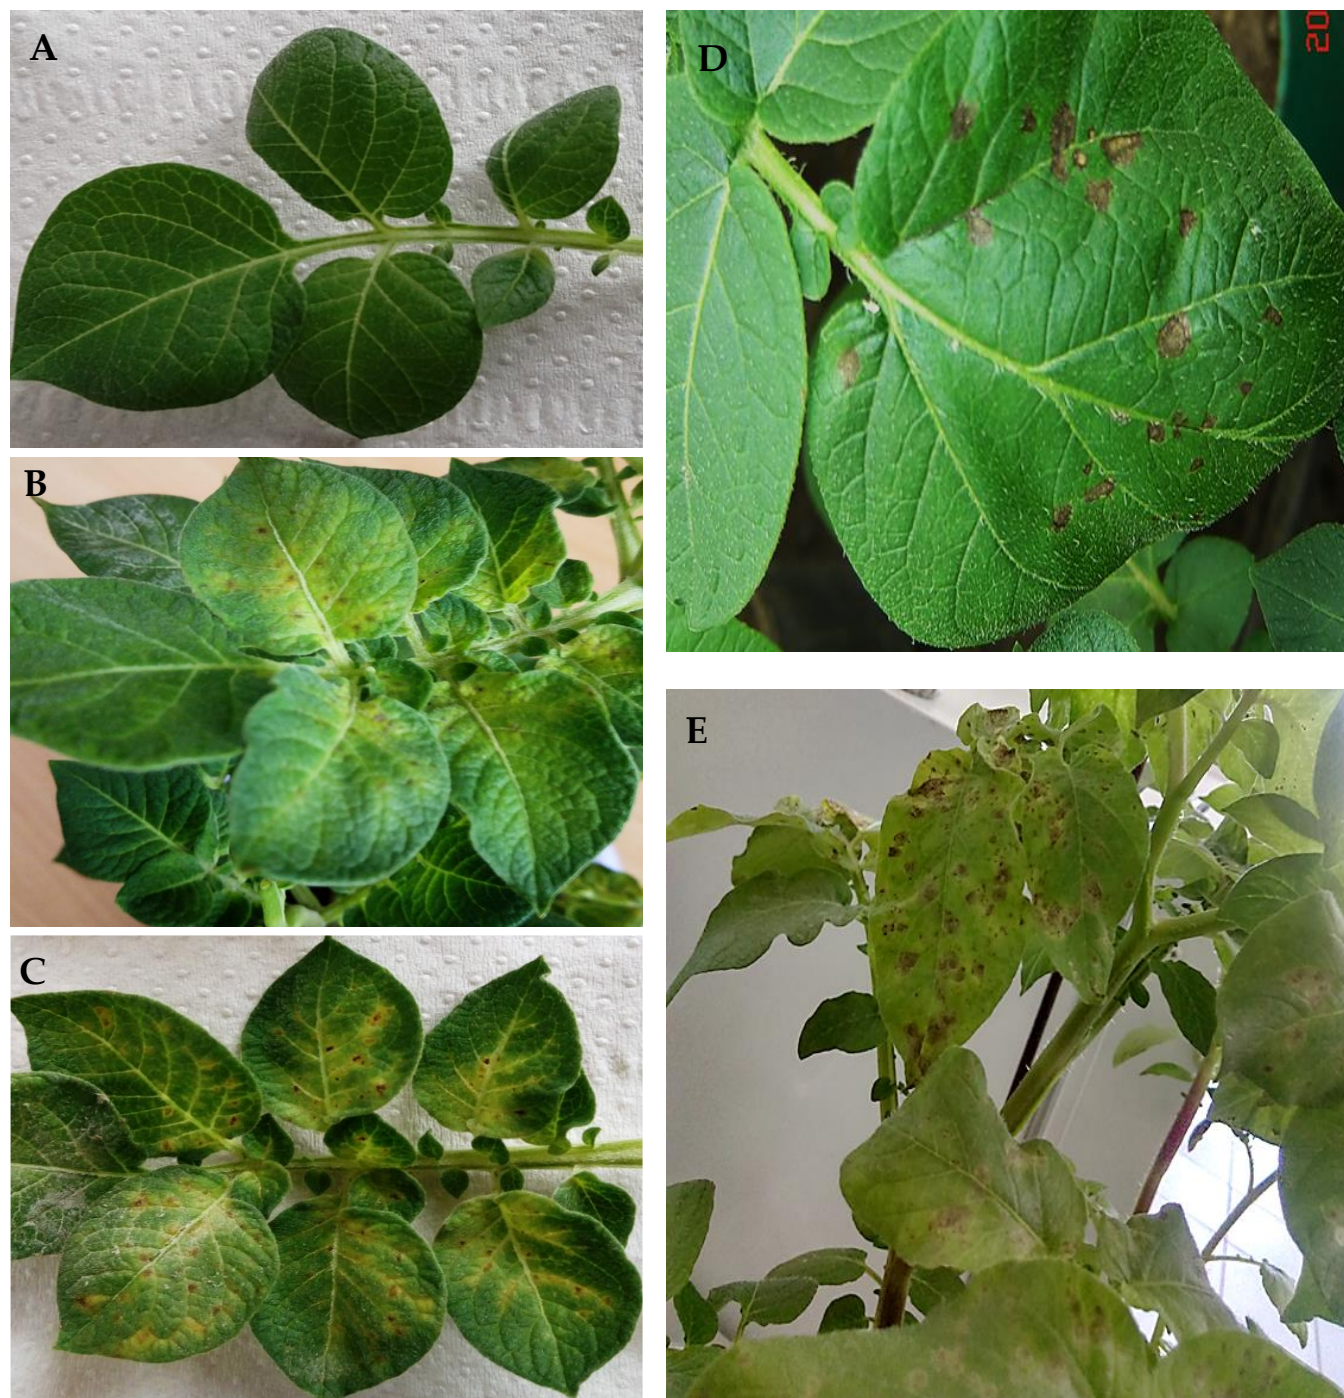

**Figure S1. Symptoms of PVY<sup>NTN</sup> inoculation:**

- (A) Healthy (mock-inoculated) potato leaflet;
- (B) Local symptom on inoculated Neptun leaf 7 dpi
- (C) Local symptoms on inoculated Neptun leaf 14 dpi
- (D) Irys leaf 7 days after inoculation, local symptoms appeared
- (E) Irys plant 21 days after inoculation, systemic symptoms

**Table S4** Gene accession numbers, primer sequences, and product lengths for RT-qPCR analyses.

| Genes          | Gene ID                       | Forward Primer                      | Reverse Primer                      | Temp of Primer Annealing (°C) | Concentration in Reaction (µM) | Product Length (bp) |
|----------------|-------------------------------|-------------------------------------|-------------------------------------|-------------------------------|--------------------------------|---------------------|
| Investigated   |                               |                                     |                                     |                               |                                |                     |
| <i>StGSTF1</i> | <i>Sotub02g0244</i><br>50.1.1 | 5'-<br>GTGGGGGTAGGGATAAGG<br>AA-3'  | 5'-<br>CAATGGACTGGGCT<br>GATTTT-3'  | 58                            | 0,5                            | 243                 |
| <i>StGSTF2</i> | <i>Sotub06g0074</i><br>40.1.1 | 5'-<br>GGCAGAGAACGAAGAGA<br>AAC -3' | 5'-<br>GGCAGAGAACGAA<br>GAGAAAC -3' | 58                            | 0.5                            | 90                  |
| <i>StGSTF5</i> | <i>Sotub12g0276</i><br>70.1.1 | 5'-<br>ACTCCGGTGAAAGTGTAC<br>GG-3'  | 5'-<br>GGGGTAGGAGGGA<br>AAATTGA-3'  | 58                            | 0.5                            | 232                 |
| Reference      |                               |                                     |                                     |                               |                                |                     |
| <i>StEF1a</i>  | AB061263                      | 5'-<br>GGTGATGCTGGTATGGTTA<br>AG-3' | 3'-<br>GGTCCTTCTTGCA<br>ACATTCTT-5' | 58                            | 0.5                            | 148                 |
| <i>Stsec3</i>  | PGSC0003D<br>MG402015451      | 5'-<br>GCTTGACACGCCATATCA<br>AT-3'  | 3'-<br>TGGATTTTACCACC<br>TTCCGCA-5' | 58                            | 0.5                            | 106                 |

**Supplement Table S4**

**Table S5.** Conditions of the RT-qPCR for the reference genes (\*).

\* Fluorescence signal reading was taken at the final stage

| Program                   | Parameters         |
|---------------------------|--------------------|
| Preliminary denaturation  | 95 °C for 5 min    |
| Amplification (35 cycles) | 95 °C for 10 s     |
|                           | 58 °C for 10 s     |
|                           | 72 °C for 20 s *   |
| Melting curve             | 65–95 °C; 0.1 °C/s |
